# Supplementary material for: Identification of motif-based interactions between SARS-CoV-2 protein domains and human peptide ligands pinpoint antiviral targets
Source: PubMed Central journal article supplement (PMC10499821; doi:10.1038/s41467-023-41312-8), 2023-09-13
Supplement: 41467_2023_41312_MOESM1_ESM.pdf [file 41467_2023_41312_MOESM1_ESM.pdf]

## **Supplementary information**

# **Identification of motif-based interactions between SARS-CoV-2 protein domains and human peptide ligands pinpoint antiviral targets**

Filip Mihalič<sup>1</sup>, Caroline Benz<sup>2</sup>, Eszter Kassa<sup>2</sup>, Richard Lindqvist<sup>3,4</sup>, Leandro Simonetti<sup>2</sup>,  
Raviteja Inturi<sup>1</sup>, Hanna Aronsson<sup>1</sup>, Eva Andersson<sup>1</sup>, Celestine N. Chi<sup>1</sup>, Norman E. Davey<sup>5</sup>,  
Anna K. Överby<sup>3,4</sup>, Per Jemth<sup>1,\*</sup>, and Ylva Ivarsson<sup>2,\*</sup>

<sup>1</sup>Department of Medical Biochemistry and Microbiology, Uppsala University, Box 582, Husargatan 3, 751 23 Uppsala, Sweden

<sup>2</sup>Department of Chemistry - BMC, Uppsala University, Box 576, Husargatan 3, 751 23 Uppsala, Sweden

<sup>3</sup>Department of Clinical Microbiology, Umeå University, 90185 Umeå, Sweden

<sup>4</sup>Laboratory for Molecular Infection Medicine Sweden (MIMS), Umeå University, 90187 Umeå

<sup>5</sup>Division of Cancer Biology, The Institute of Cancer Research, 237 Fulham Road, London SW3 6JB, UK.

\*Corresponding authors: Per.Jemth@imbim.uu.se; ylva.ivarsson@kemi.uu.se

Supplementary figures

**Supplementary Figure 1. All affinity measurements performed in this study.**

**Supplementary Figure 2. Alignment of the peptides identified by ProP-PD screens.**

**Supplementary Figure 3. Fluorescence polarization experiments testing the importance of tyrosine 1084 in NCOA2<sub>1074-1089</sub> for binding to Nsp3 Ubl1.**

**Supplementary Figure 4. Models and confidence scores from ColabFold predictions for binding between Nsp3 globular domains and peptides identified in ProP-PD selections.**

**Supplementary Figure 5. SPOT array alanine scans for the PRDM14<sub>197-213</sub> peptide.**

**Supplementary Figure 6. Conservation of selected human peptides across animals.**

**Supplementary Figure 7. Model and confidence scores of ColabFold predictions for interaction between Nsp5 with DLG3<sub>577-592</sub> peptide.**

**Supplementary Figure 8. ColabFold for Nsp9**

**Supplementary Figure 9. Fluorescence polarization experiments of Nsp9 binding pocket mutant and the CD analysis of the Nsp9 $\Delta\alpha$**

**Supplementary Figure 10. Raw HSQC spectra and Nsp9-peptide model**

**Supplementary Figure 11. Surface representation of the Nsp9 NMR results**

**Supplementary Figure 12. ColabFold for Nsp16**

**Supplementary Figure 13. GST-pulldown experiments.**

**Supplementary Figure 14. ColabFold prediction of the peptide ligands identified in this study in the context of full-length proteins**

**Supplementary Figure 15. Cell penetrating peptides fail to inhibit HCoV 229E proliferation**

### Nsp1

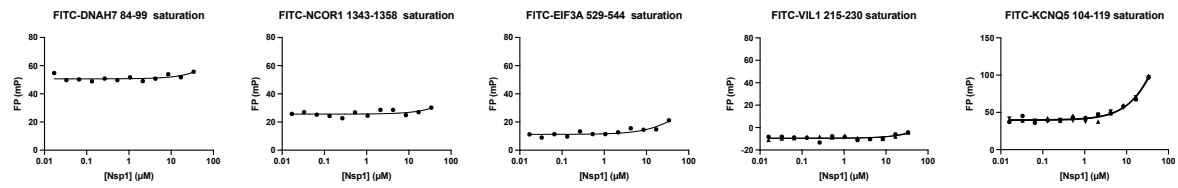

### Nsp3 Ub1

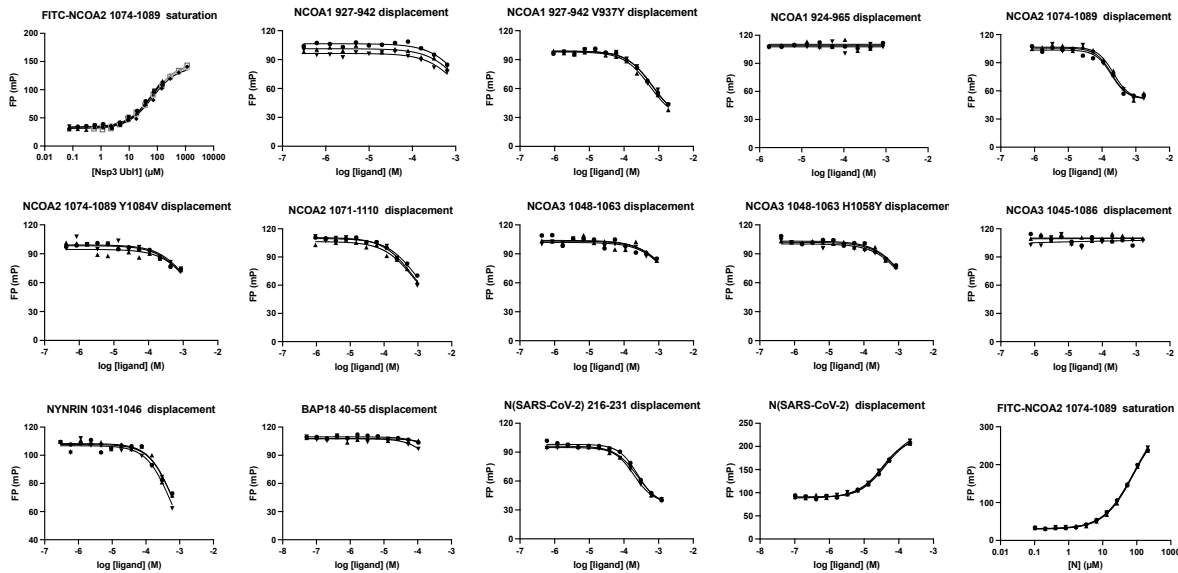

### Nsp3 ADRP

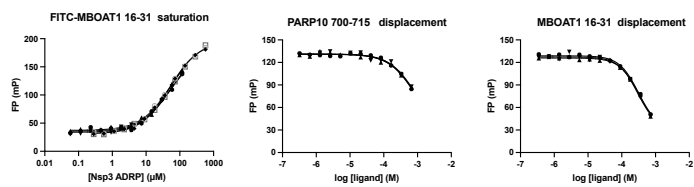

### Nsp3 ADRP pocket mut

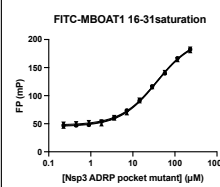

### Nsp3 Ub1 pocket mut

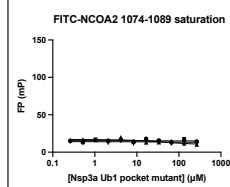

### Nsp3 SUD-M

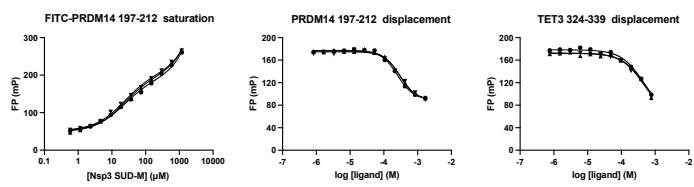

### Nsp3 SUD-M pocket mut

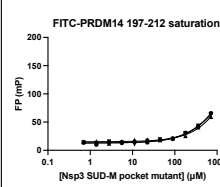

### Nsp9 double mut

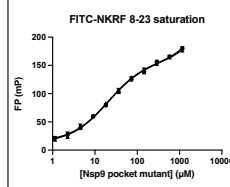

### Nsp9

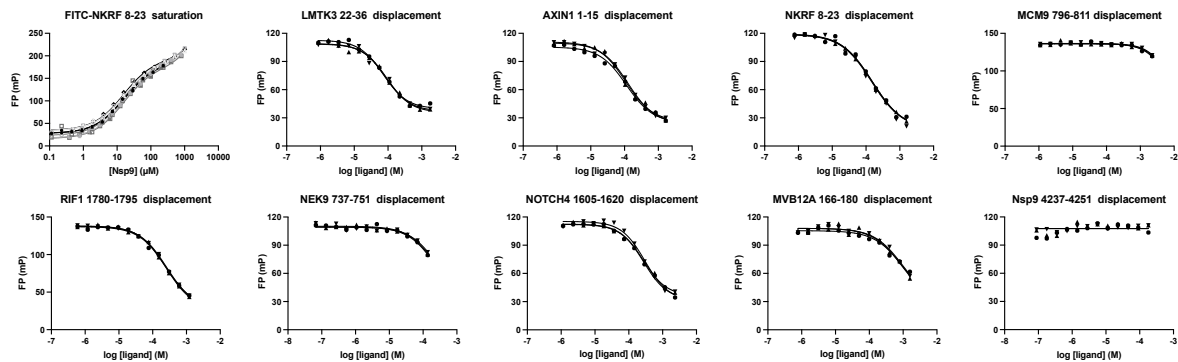

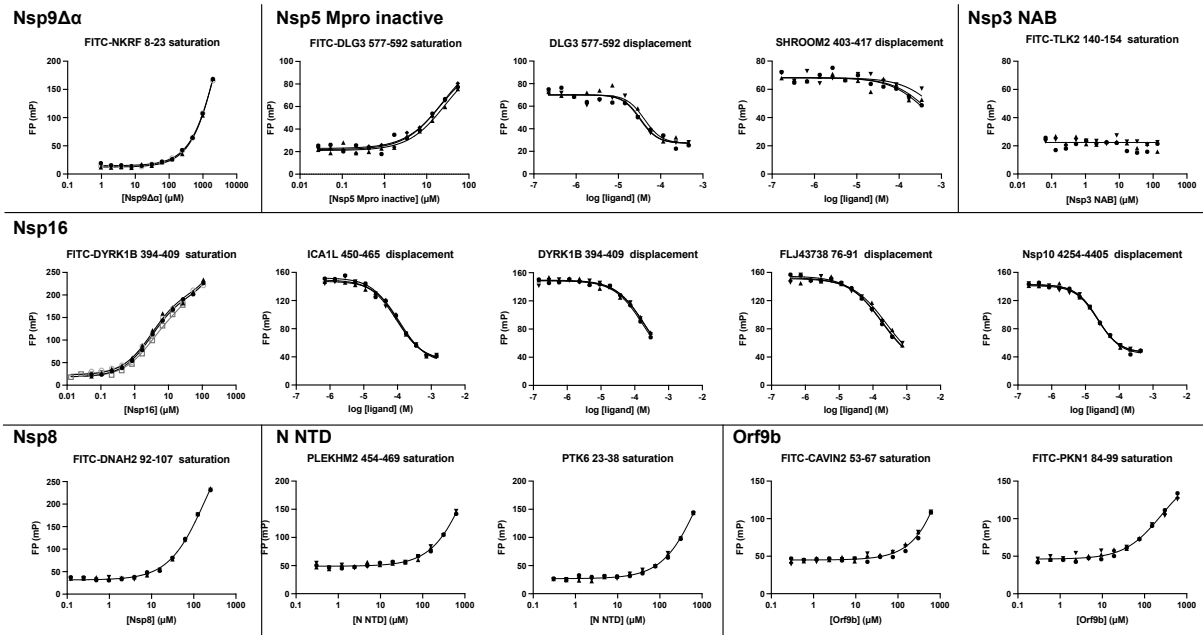

**Supplementary Figure 1.** All affinity measurements performed in this study. Peptide sequences and calculated  $K_D$  values are presented in Supplementary Data 4. For all datasets the  $N^3$  except for Nsp1. In the case of Nsp1,  $N=1$  for FITC-DNAH784-99, FITC-NCOR11343-1358, FITC-EIF3A529-544,  $N=2$  for FITC-VIL1215-230, and  $N=3$  for KCNQ5104.



| A         |                                                                       |          | B         |                                                   |         |
|-----------|-----------------------------------------------------------------------|----------|-----------|---------------------------------------------------|---------|
|           | Peptide sequence                                                      | Protein  |           | Peptide sequence                                  | Protein |
| Nsp3 Ubl1 | 631-QEDEW <b>W</b> NVQY <b>P</b> DQP <b>E</b> E-646                   | PLEKHM1  | Nsp3 ADRP | 18-GSTYL <b>H</b> PL <b>S</b> ELLG <b>I</b> PL-33 | MBOAT1  |
|           | 973-NTFCTY <b>L</b> LEQ <b>I</b> D <b>M</b> LFF-988                   | PCNX2    |           | 1-MAG <b>Y</b> L <b>S</b> ESDFVMVEEG-16           | AZIN2   |
|           | 1031-CPSLSE <b>E</b> IL <b>R</b> C <b>L</b> SLHD-1046                 | NYNRIN   |           | 700-DGGTDGKAQLVVHSAF-715                          | PARP10  |
|           | 286-NDDL <b>V</b> Q <b>R</b> L <b>M</b> D <b>I</b> L <b>Y</b> ASE-301 | MAPRE2   |           |                                                   |         |
|           | 1074-SDEGAL <b>L</b> D <b>Q</b> L <b>Y</b> LALRN-1089                 | NCOA2    |           |                                                   |         |
|           | 1145-WSQVDEATIRAL <b>I</b> I <b>A</b> VL-1160                         | YTHDC2   |           |                                                   |         |
|           | 40-AKWTE <b>T</b> E <b>I</b> E <b>M</b> LRAAVK-55                     | BAP18    |           |                                                   |         |
| C         |                                                                       |          |           |                                                   |         |
|           | Peptide sequence                                                      | Protein  |           |                                                   |         |
| Nsp16     | 452-DMSAW <b>F</b> N <b>L</b> FADLDPLS-467                            | ICA1L    |           |                                                   |         |
|           | 447-KAASDLTAW <b>F</b> S <b>L</b> FADL-462                            | ICA1     |           |                                                   |         |
|           | 394-PGHSPADYLR <b>F</b> Q <b>D</b> LVL-409                            | DYRK1B   |           |                                                   |         |
|           | 78-PLDSYLN <b>F</b> Q <b>A</b> LISPRE-93                              | FLJ43738 |           |                                                   |         |
|           | 324-TDPLIRWDSYENLSAD-339                                              | TNS3     |           |                                                   |         |
|           | 228-AHHTGSTASSEITPAQ-243                                              | SCAPER   |           |                                                   |         |

**Supplementary Figure 2. Alignment of the peptides identified by ProP-PD screens. (A)** Peptides identified by ProP-PD screens against Nsp3 Ubl1. Hydrophobic residues roughly corresponding to  $\Phi$ xx $\Phi$ x $\Phi$  are in bold. **(B)** Peptides identified by ProP-PD screens against Nsp3 ADRP. The common LSE motif is in bold. **(C)** Peptides identified by ProP-PD screens against Nsp16. The [W/F]xxx $\Phi$  motif is in bold.

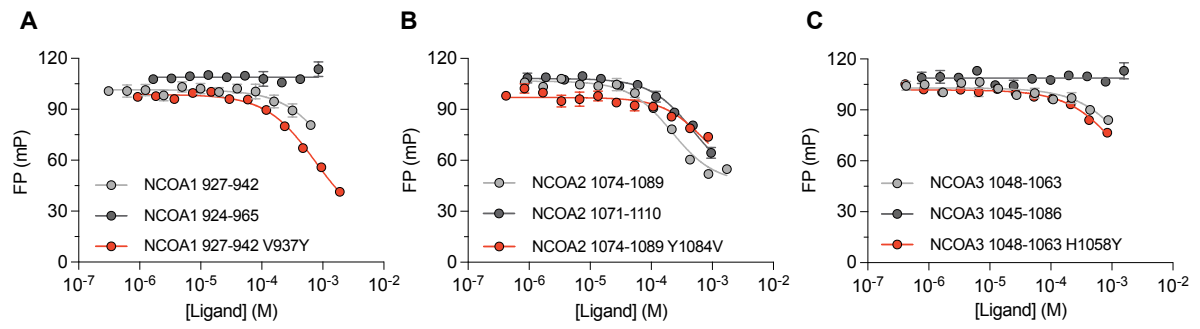

**Supplementary Figure 3. Fluorescence polarization experiments testing the importance of tyrosine 1084 in NCOA2<sub>1074-1089</sub> for binding to Nsp3 Ubl1.** (A) Comparison of short, long and V937Y mutant of NCOA1 peptide binder. (B) Comparison of short, long and Y1084V mutant of NCOA2 peptide binder. (C) Comparison of short, long and H1058Y mutant of NCOA3 peptide binder.

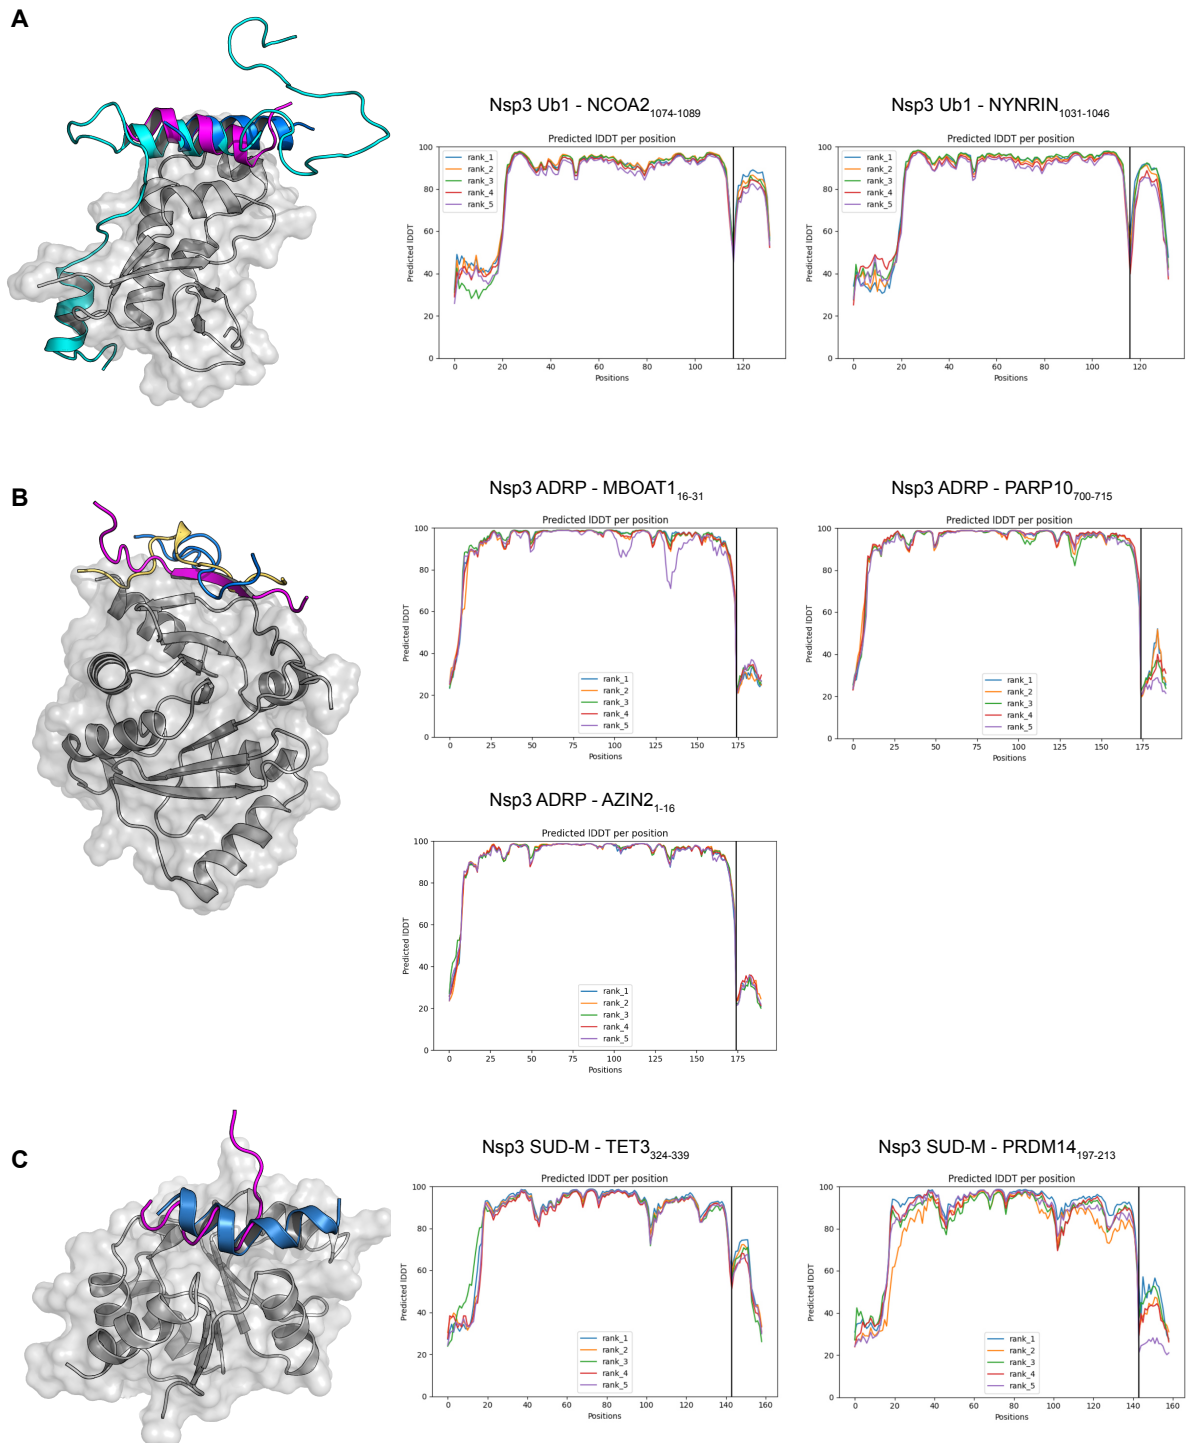

**Supplementary Figure 4. Models and confidence scores from ColabFold predictions for binding between Nsp3 globular domains and peptides identified in ProP-PD selections. (A) Model and confidence scores for prediction of Nsp3 Ub1 in complex with peptides. The vertical line in the IDDT graph of this and all subsequent IDDT graphs represent the break between the globular domain and the peptide. The NCOA2<sub>1074-1089</sub> peptide is in blue, and the NYNRIN<sub>1031-1046</sub> peptide is purple. In light blue the Ub1 binding peptide from N (SARS-CoV-2) is superimposed (PDBid: 7PKU) (B) Model and confidence scores for prediction of Nsp3 ADRP in complex with**

peptides. The MBOAT1<sub>16-31</sub> peptide is in blue, the PARP10<sub>700-715</sub> peptide is in purple, and the AZIN1<sub>1-16</sub> peptide is yellow. (C) Model and confidence scores for prediction of Nsp3 SUD-M in complex with peptides. The TET<sub>324-339</sub> peptide is in blue, and the PRDM14<sub>1074-1089</sub> peptide is purple.

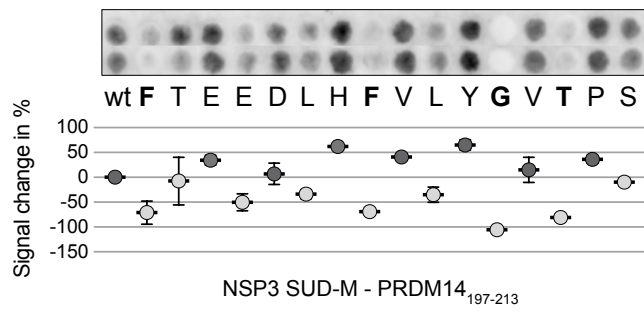

**Supplementary Figure 5. SPOT array alanine scans for the PRDM14<sub>197-213</sub> peptide.** The peptide was challenged with Nsp3 SUD-M. The residues where clear reduction of binding is observed are in bold. Data are presented as mean  $\pm$  SD (N = 2).

**A**

Alignment of the CBP-interacting motif of NCOAs. The region is conserved across jawed vertebrates

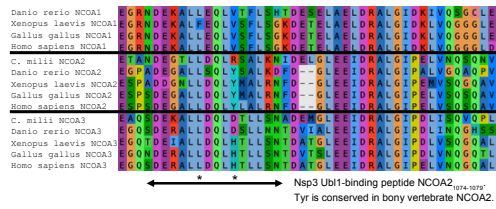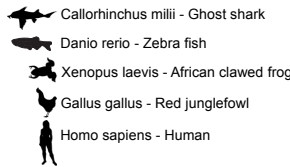

Monodelphis domestica - Gray short-tailed opossum  
Loxodonta africana - African bush elephant  
Choloepus didactylus - Linnaeus's two-toed sloth  
Bos taurus - Cattle  
Canis lupus familiaris - Domestic dog  
Rattus norvegicus - Brown rat  
Alligator mississippiensis - American alligator

Alignment of NYNRIN from placental mammals.

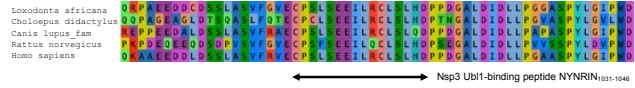

Alignment of the N-terminal region of MBOAT1. The region is conserved across jawed vertebrates

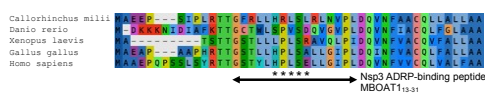

Alignment of PARP10 from mammals. The conservation in this region across jawed vertebrates is very low

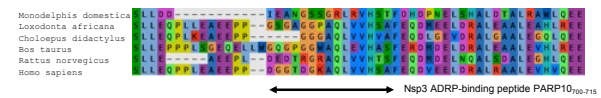

Alignment of TET3. The putative motif is embedded in a region of very low conservation.

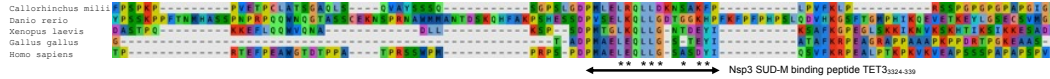

Alignment of PRDM14. The putative motif is within a region of very low conservation.

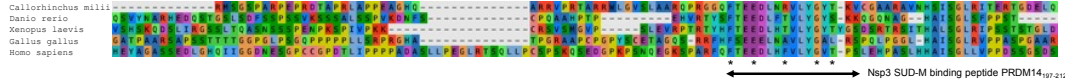

**B**

Alignment of NKRF with the predicted N-terminus of H. sapiens NKRF. The putative motif is conserved across jawed vertebrates, but the following C-terminal residues are not

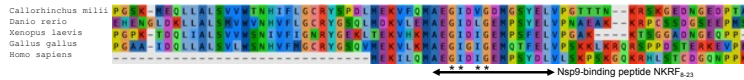

Alignment of N-terminal region of LMTK3. The region containing the putative motif is conserved in mammals but not across jawed vertebrates.

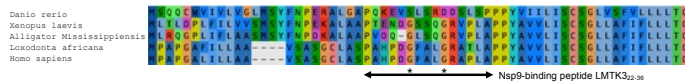

Alignment of NOTCH4 from mammals and NOTCH3 from jawed vertebrates. NOTCH4 was only found in mammals and the paralogue NOTCH3 is shown to illustrate deeper evolution. The GxxxG motif is not conserved

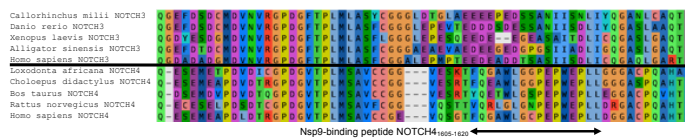

**C**

Alignment of mammalian ICA1L (C-terminus). The region containing the peptide is conserved among mammals

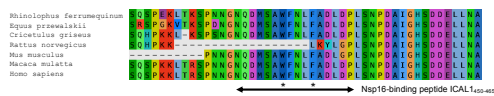

Hydra vulgaris - Fresh-water polyp  
Mytilus coruscus - Korean mussel  
Mytilus edulis - Blue mussel  
Rhinocodon tpus - Whale shark  
Anguilla anguilla - European eel  
Danio rerio - Zebra fish  
Salmo salar - Atlantic salmon  
Latimeria chalumnae - West Indian Ocean coelacanth  
Alligator mississippiensis - American alligator  
Struthio camelus australis - South African ostrich  
Haliaeetus albicilla - White-tailed eagle  
Rhinolophus ferrumequum - Greater horseshoe bat  
Equus przewalskii - Przewalski's horse  
Erinaceus europaeus - European hedgehog  
Physeter macrocephalus - Sperm whale  
Ursus arctos horribilis - Grizzly bear  
Cricetulus griseus - Chinese hamster  
Rattus norvegicus - Brown rat  
Mus musculus - House mouse  
Macaca mulatta - Rhesus macaque  
Homo sapiens - Human

Alignment of DYRK1B. Peptide is part of the region conserved in jawed vertebrates

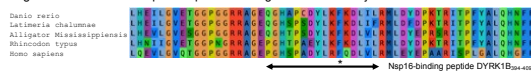

Alignment of uncharacterized protein FL43738 (Q6ZUG5). The peptide is part of a putative loop region that might be ordered rather than disordered

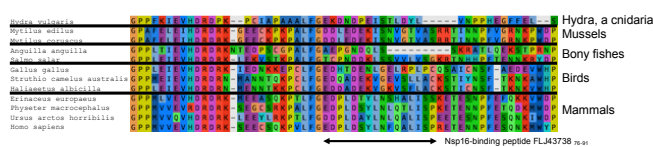

**Supplementary Figure 6. Conservation of selected human peptides across animals.** To investigate whether the peptides enriched in the ProP-PD selection against folded SARS-CoV-2 domains contain native binding motifs,

their sequence conservation between different animals was analyzed. The full-length human protein containing the peptide was aligned using the web version of Muscle<sup>1</sup> with orthologs or paralogs from selected animals in different branches of the animal kingdom. Only a small part of the alignment is shown, the region containing the peptide and its flanking sequences. The human 16- amino acid peptides that were enriched are indicated by arrows. Stars (\*) denote that the amino acid position was confirmed by dot blot analysis to contribute to the binding of the SARS-CoV-2 protein domain. **(A)** Three domains from SARS-CoV-2 Nsp3 (Ubl1, ADRP and SUD-M) and the binding region for six human proteins, NCOA2, NYNRIN, MBOAT1, PARP10, TET3 and PRDM14. The entire region shown for NCOA2 (and its paralogs NCOA1 and 3) forms an interface with the NCBD domain in the transcriptional coregulator CBP/p300. **(B)** Three Nsp9-binding proteins: NKRF, LMTK3 and NOTCH4. The phylogeny among the paralogs in the NOTCH family is not clear. While NOTCH3 is found in all jawed vertebrates, NOTCH4 has so far only been found in mammals. **(C)** Three Nsp16-binding proteins: ICA1L, DYRK1B and FLJ43738 (unknown function). FLJ43738 is also called KIAA1257 and apparently present across the animal kingdom. The phylogeny with potential paralogs is not clear. See Supplementary Data 4 for  $K_D$  values and UniProt accession numbers.

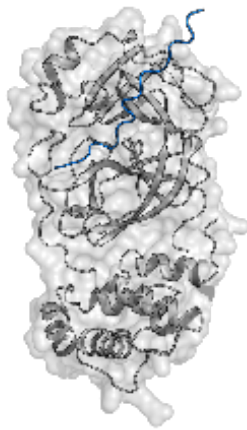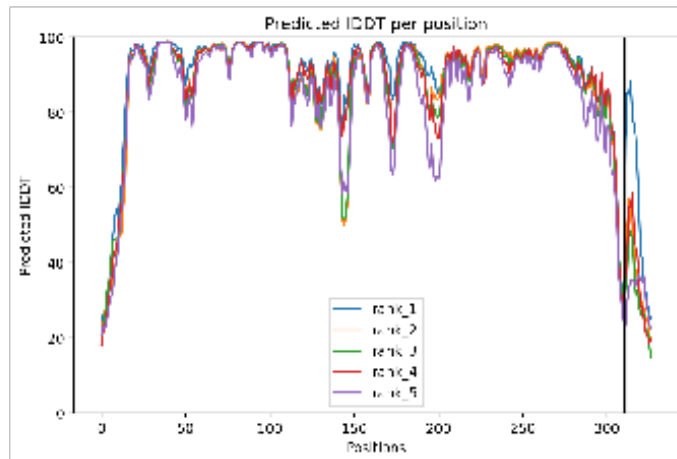

**Supplementary Figure 7. Model and confidence scores of ColabFold predictions for interaction between Nsp5 with DLG3<sup>577-592</sup> peptide.** Nsp5 is shown in gray cartoon, and peptide in blue ribbon. Only the rank one model is shown.



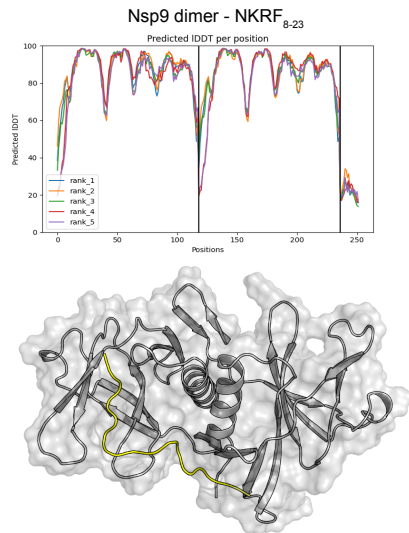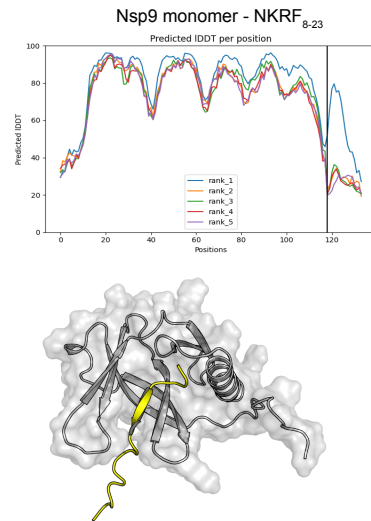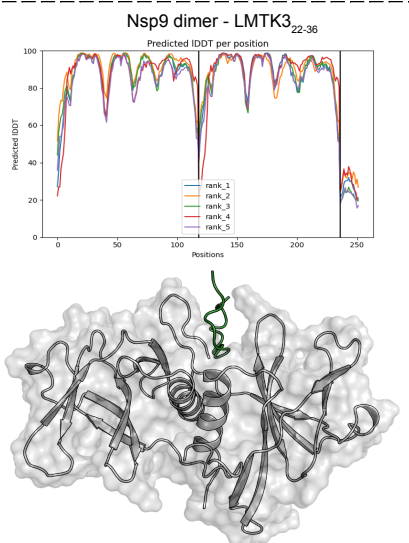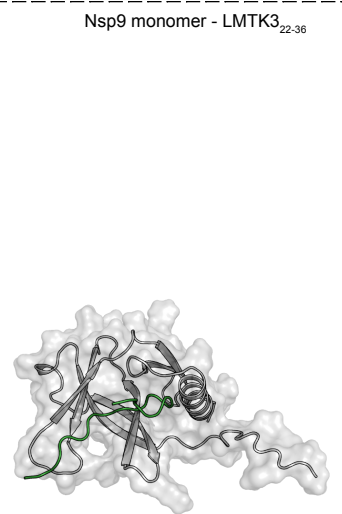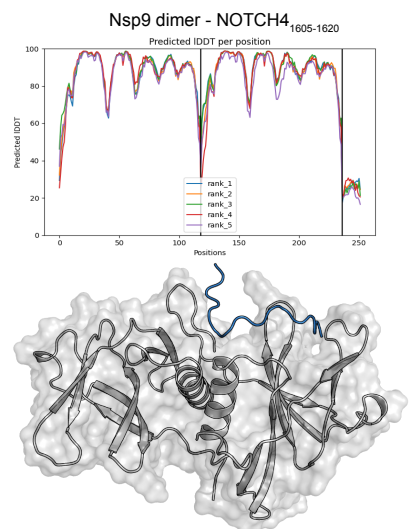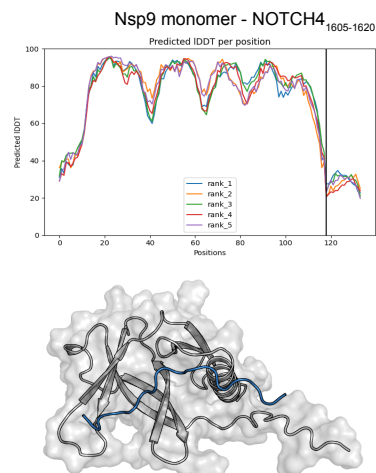

**Supplementary Figure 8. Models and confidence scores of ColabFold predictions for interaction between Nsp9 with NKRF<sub>8-23</sub>, LMTK3<sub>22-36</sub>, and NOTCH4<sub>1605-1620</sub> peptides.** For all three peptides the prediction was run with either monomeric or dimeric Nsp9. The predicted peptides did not converge with either Nsp9 monomer or dimer model.

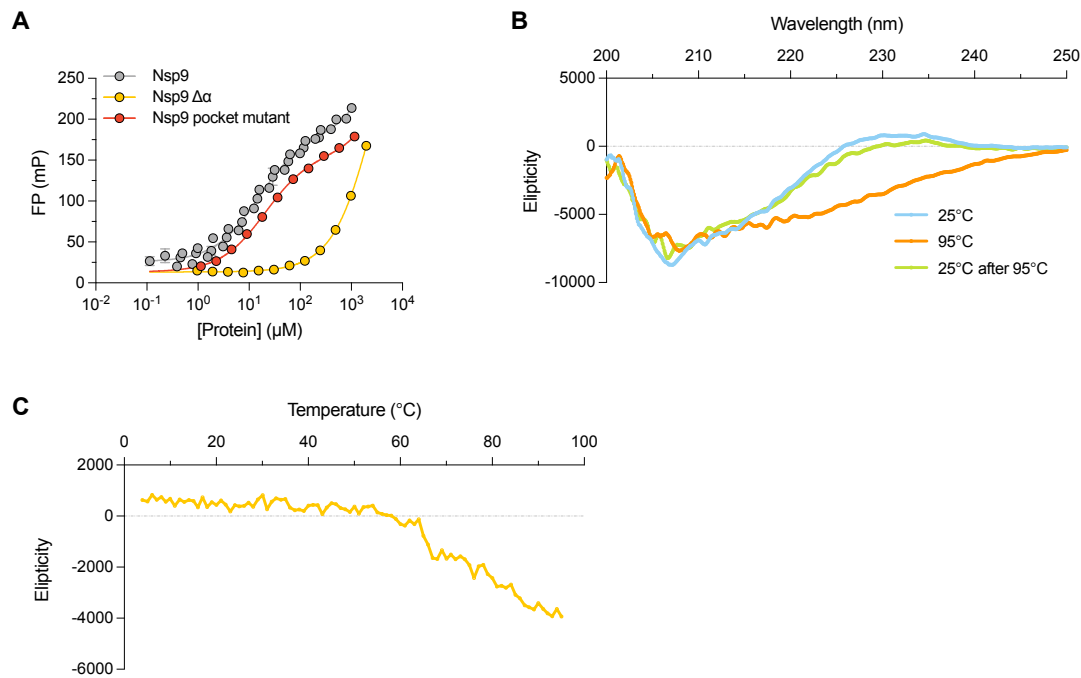

**Supplementary Figure 9. Fluorescence polarization experiments of Nsp9 predicted binding pocket mutant and the CD analysis of the Nsp9 $\Delta\alpha$ .** (A) Comparison of the binding between FITC-NKRF<sub>8-23</sub> and Nsp9 (gray), Nsp9 with deleted C-terminal helix (Nsp9 $\Delta\alpha$ ; yellow) or Nsp9 binding pocket mutant (G4240N, G4244D; red). Data is represented as mean  $\pm$  SEM (N = 3). (B) CD spectra of Nsp9 $\Delta\alpha$  before thermal denaturation (25 $^{\circ}\text{C}$ ), at 95 $^{\circ}\text{C}$  and at 25 $^{\circ}\text{C}$  after thermal denaturation. (N=4) (C) Thermal denaturation of the Nsp9 $\Delta\alpha$  construct monitored by circular dichroism at 228 nm. Sigmoidal reduction in the CD signal indicates unfolding thus confirming that at room temperature the construct is folded. (N=1)

**A**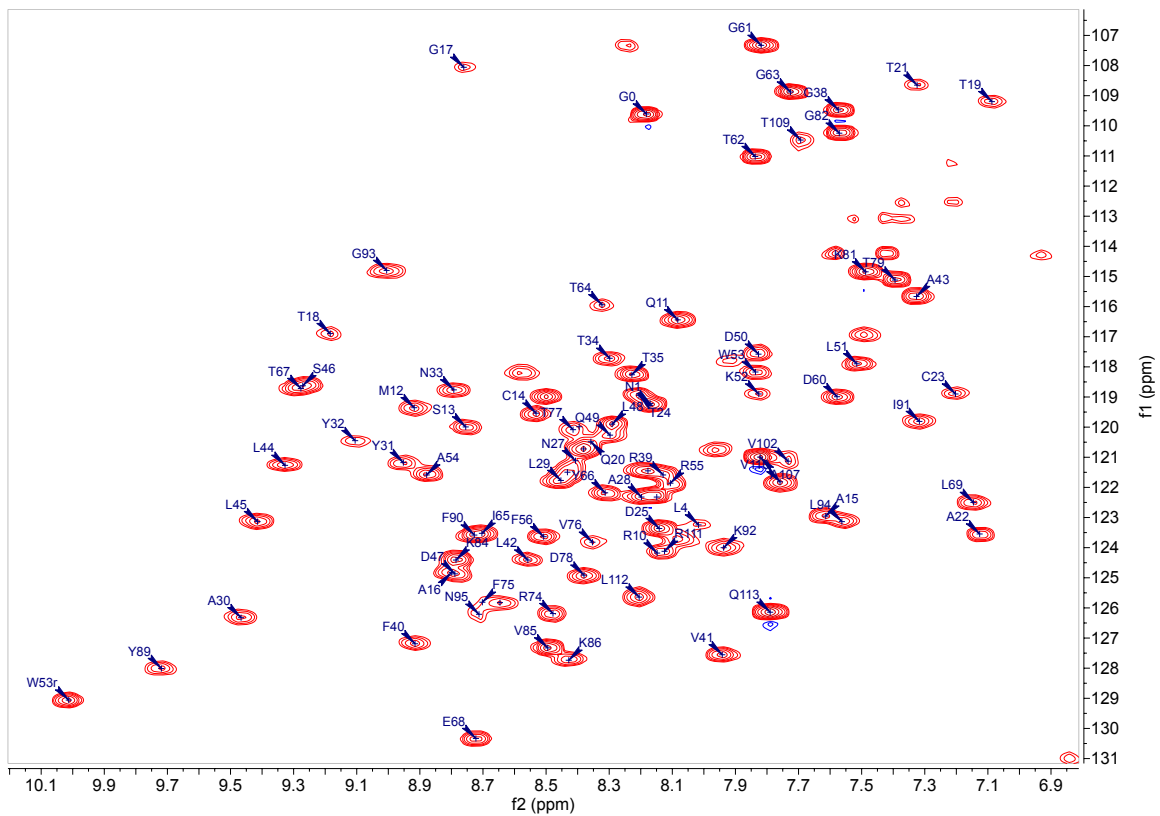**B**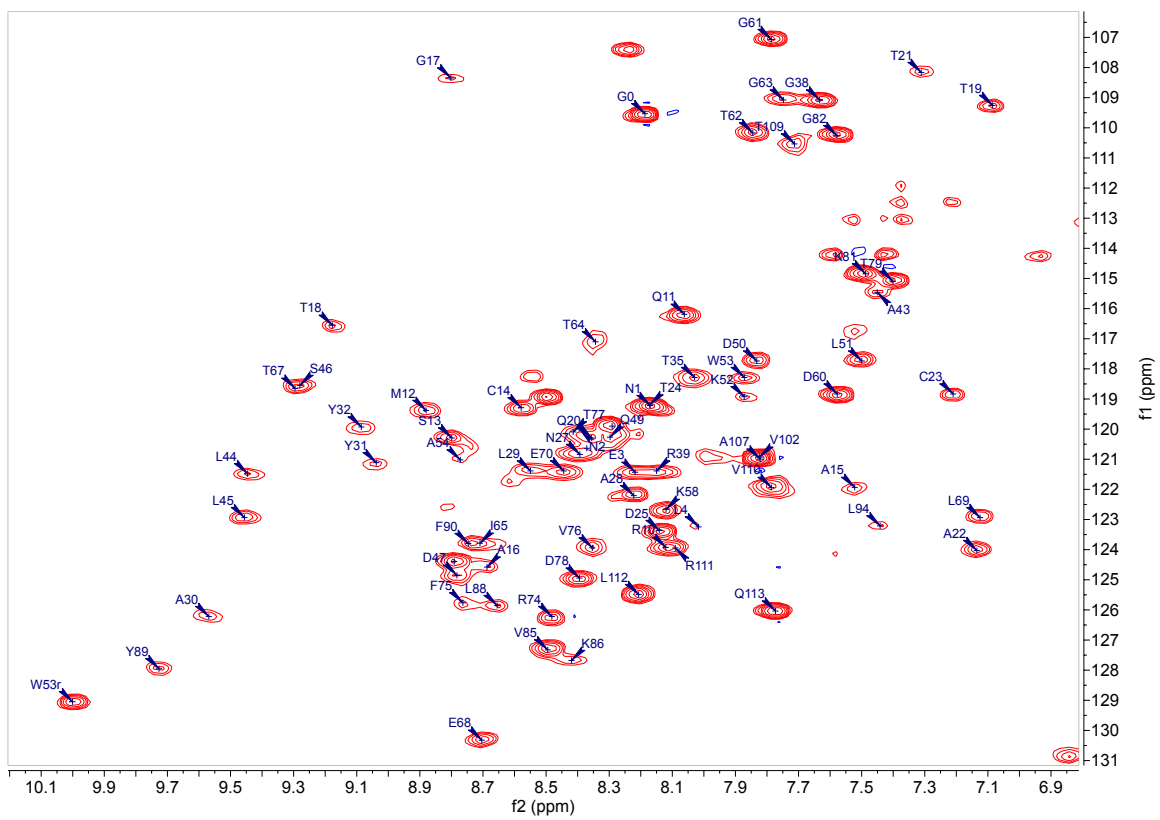

C

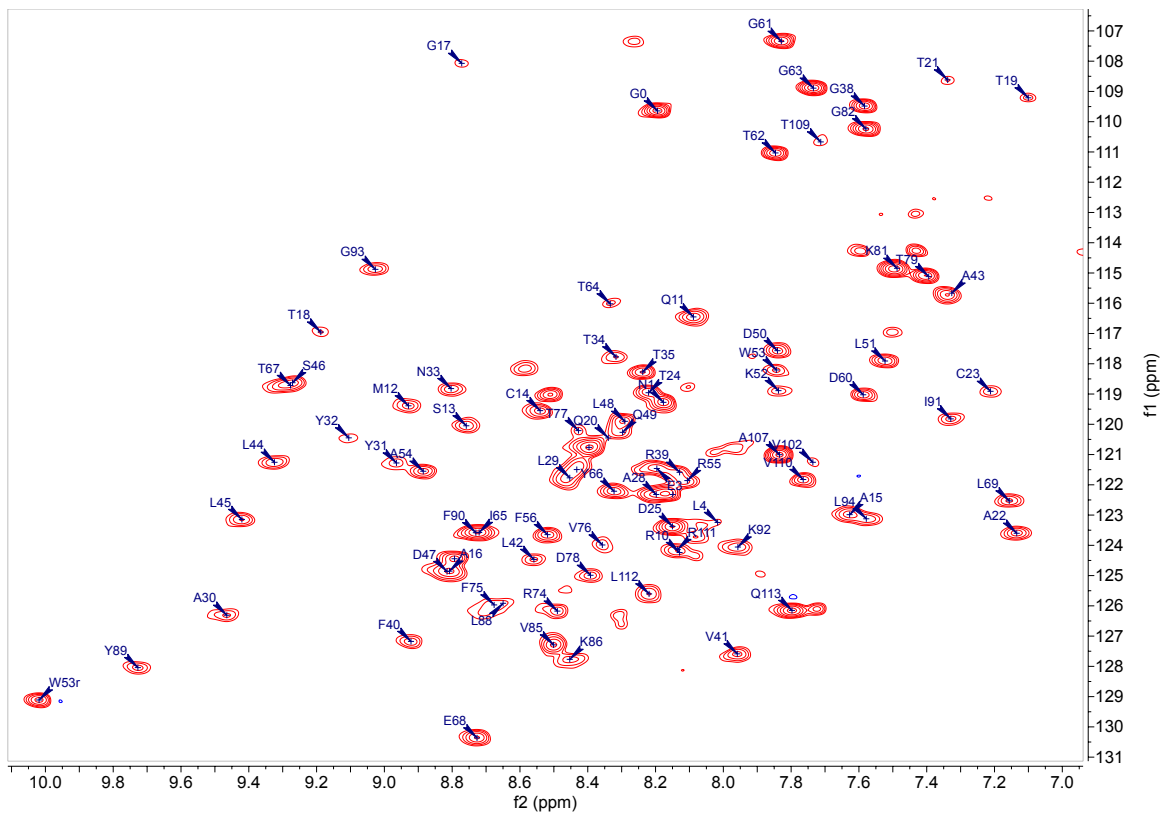

D

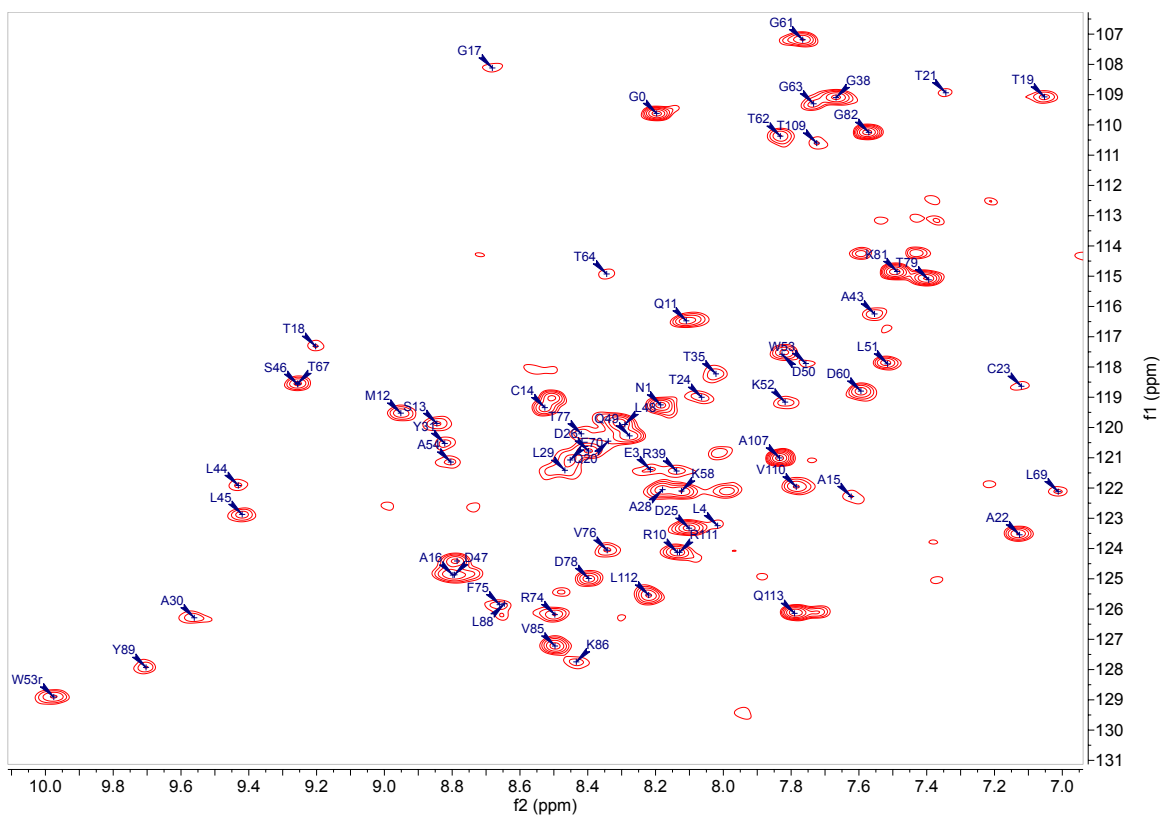

**E**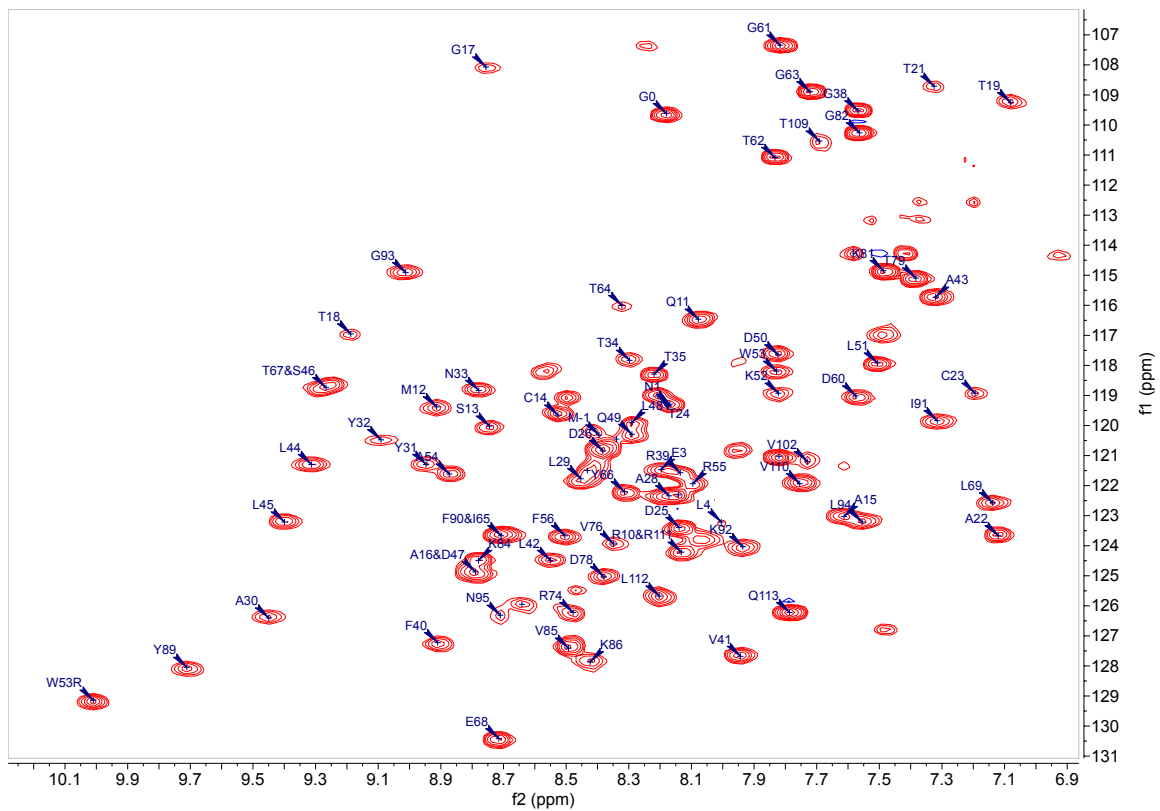**F**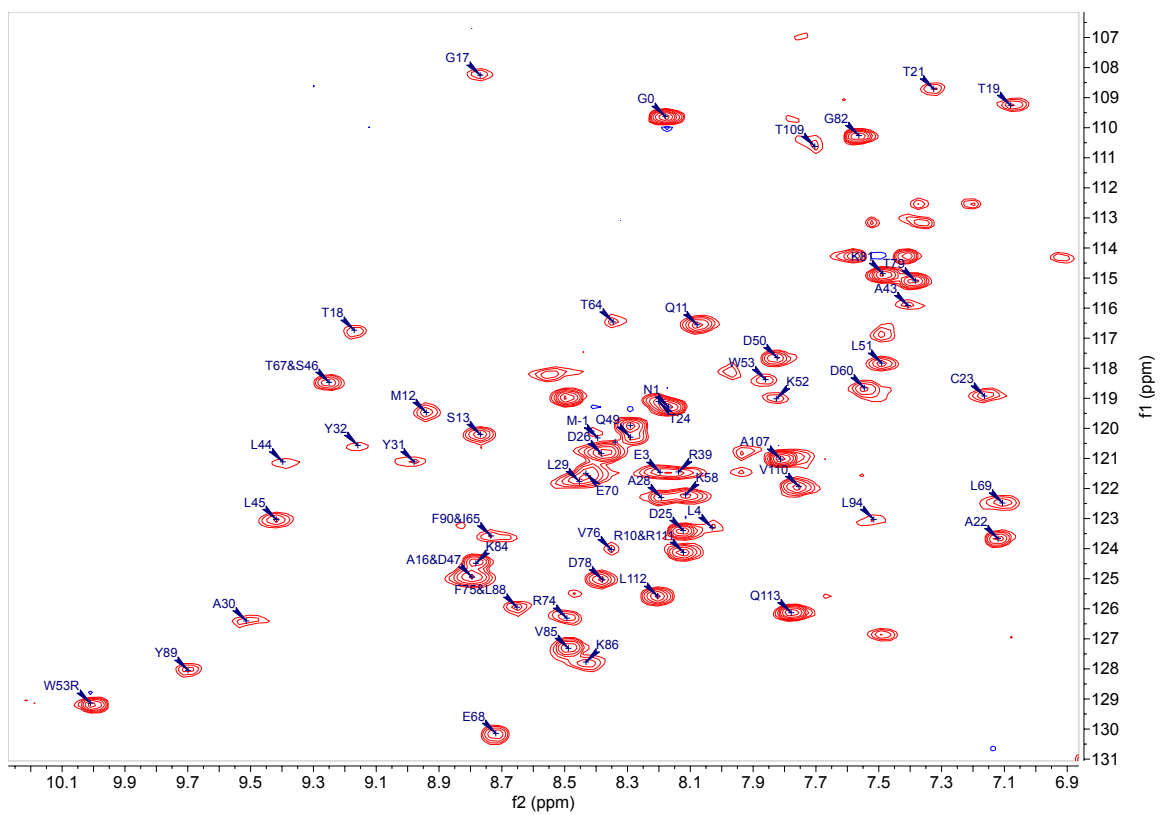

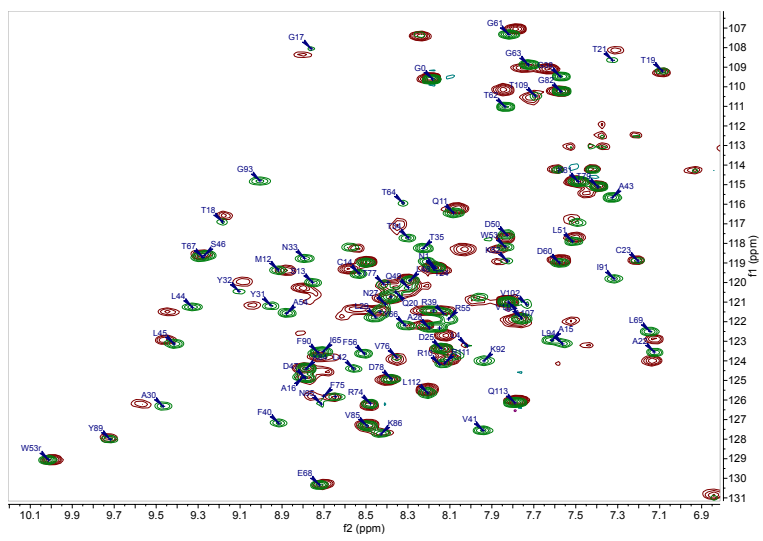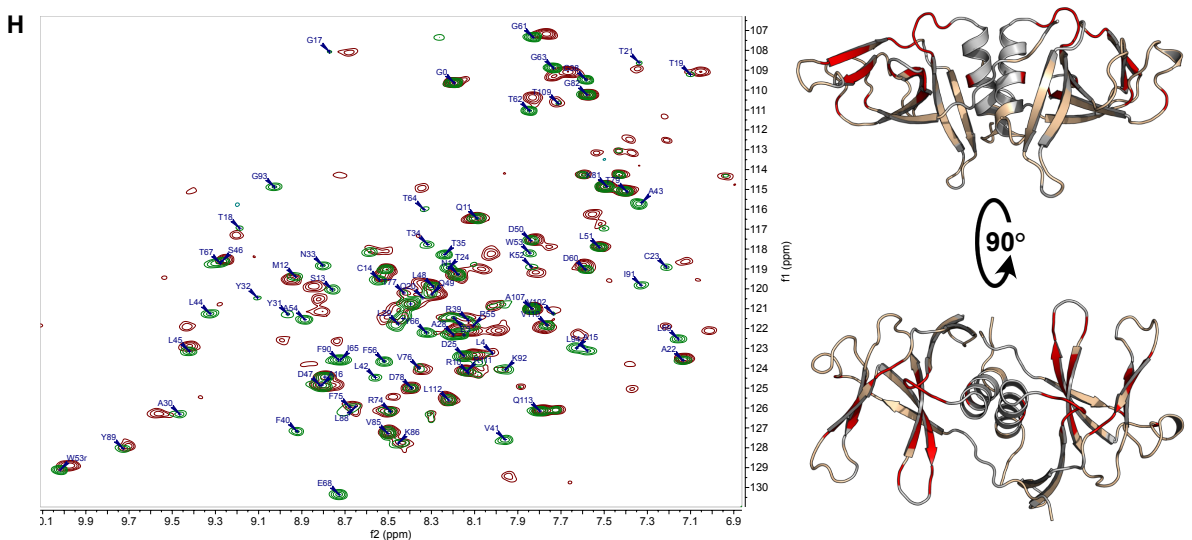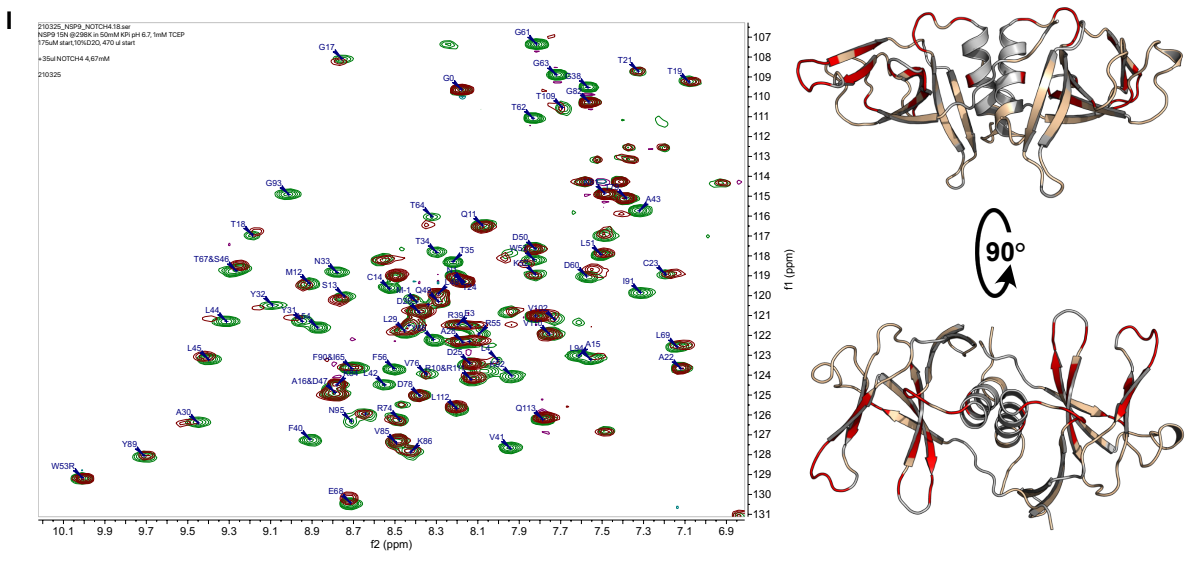

**Supplementary Figure 10. Raw HSQC spectra and Nsp9 model with highlighted peak shift changes for NKRF8-23, LMTK322-36 and NOTCH41605-1620 peptides.**

(A) Chemical shift annotation for Nsp9 without added peptide for the experiment where NKRF8-23 was added

to the Nsp9. **(B)** Chemical shift annotation for Nsp9 with NKRF8-23 peptide.

**(C)** Chemical shift annotation for Nsp9 without peptide for the experiment where LMTK3<sub>22-36</sub> was added to the Nsp9. **(D)** Chemical shift annotation for Nsp9 with LMTK3<sub>22-36</sub> peptide. **(E)** Chemical shift annotation for Nsp9 without peptide for the experiment where NOTCH4<sub>1605-1620</sub> was added to the Nsp9. **(F)** Chemical shift annotation for Nsp9 with NOTCH4<sub>1605-1620</sub> peptide. **(G)** Overlay of spectra from **(A)** and **(B)**. **(H)** Overlay of spectra from **(C)** and **(D)**. On the right side the residues of Nsp9 with a chemical shift change larger than one standard deviation upon addition of LMTK3<sub>22-36</sub> are highlighted in red, the residues whose shift is below that threshold are in beige and the unassigned residues in gray. **(I)** Overlay of spectra from **(E)** and **(F)**. On the right side, residues of Nsp9 with a chemical shift change larger than one standard deviation upon addition of NOTCH4<sub>1605-1620</sub> are highlighted in red, the residues whose shift is below that threshold are in beige and the unassigned residues in gray.

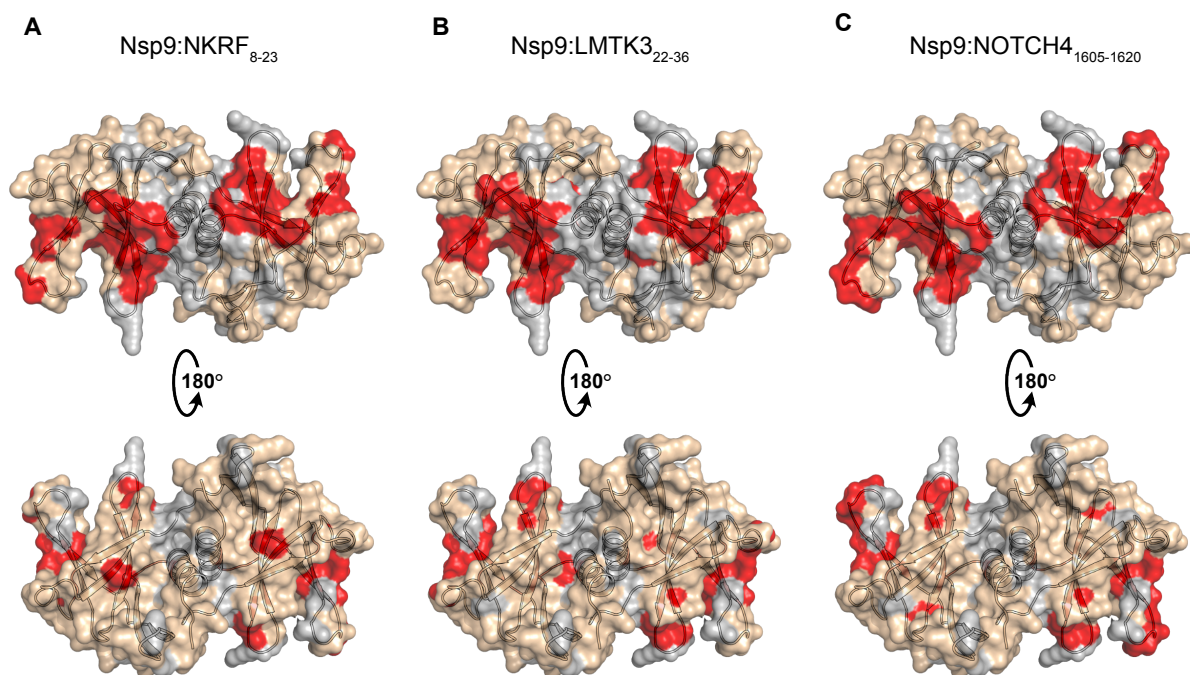

**Supplementary Figure 11. Surface representation of the residues affected by the addition of peptide ligands as measured by NMR.**

**(A)** Chemical shift perturbations upon addition of NKRF<sub>8-23</sub> peptide. The residues that were perturbed by more than one standard deviation are in red, the ones below that threshold are in beige and the residues that could not be assigned are in gray. Top view is the same as in the right panel of **Figure 5F**. **(B)** Chemical shift perturbations upon addition of peptide LMTK3<sub>22-36</sub>. Coloring is the same as in (A). Top view is the same as in the bottom panel of **Figure S10H**. **(C)** Chemical shift perturbations upon addition of peptide NOTCH4<sub>1605-1620</sub>. Coloring is the same as in (A). Top view is the same as in the bottom panel of **Figure S10I**.



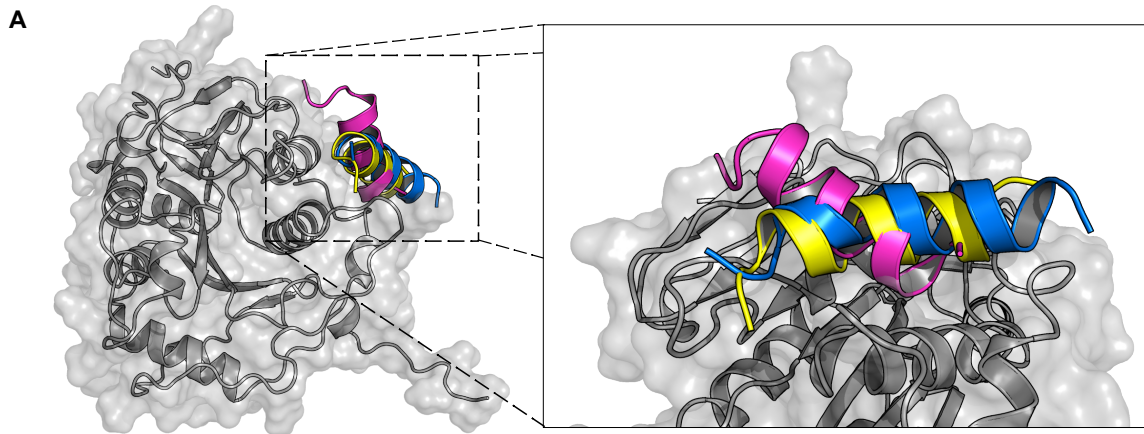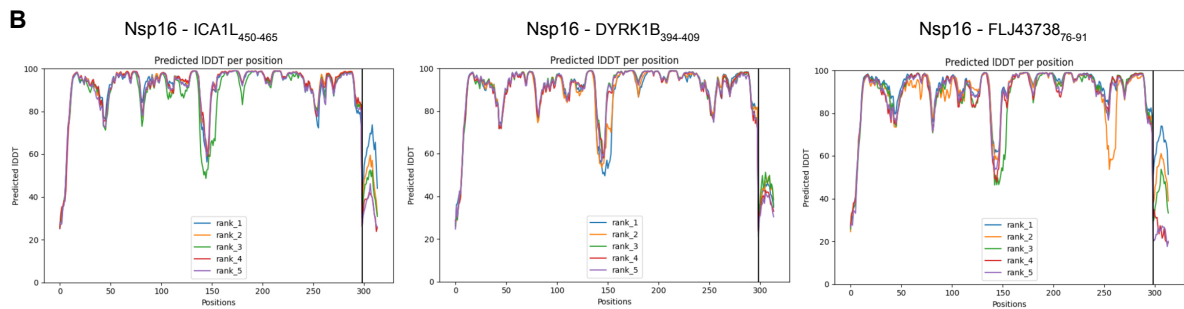

**Supplementary Figure 12. Models and confidence scores of ColabFold predictions for the interaction between Nsp16 and DYRK1B395-410, ICA1L450-465, and FLJ4373876-91 peptides. (A) Superimposed best predicted model for the interaction. The ICA1L450-465 peptide is in blue the DYRK1B395-410 peptide in purple and the FLJ4373876-91 peptide is in yellow. (B) Confidence scores for the predictions.**

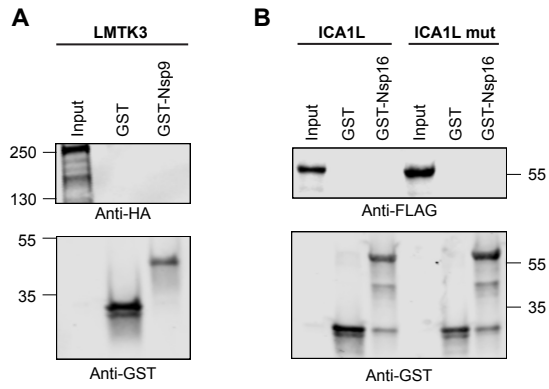

**Supplementary Figure 13. GST-pulldown experiments.** (A) Full length LMTK3 was expressed in HEK293T cells, and the capture was performed with GST-tagged Nsp9. (B) Full length ICA1L and ICA1L motif mutant (W456A, F460A) were expressed in HEK293T cells, and the capture was attempted with GST-tagged Nsp16. GST-tag alone serves as a negative control.

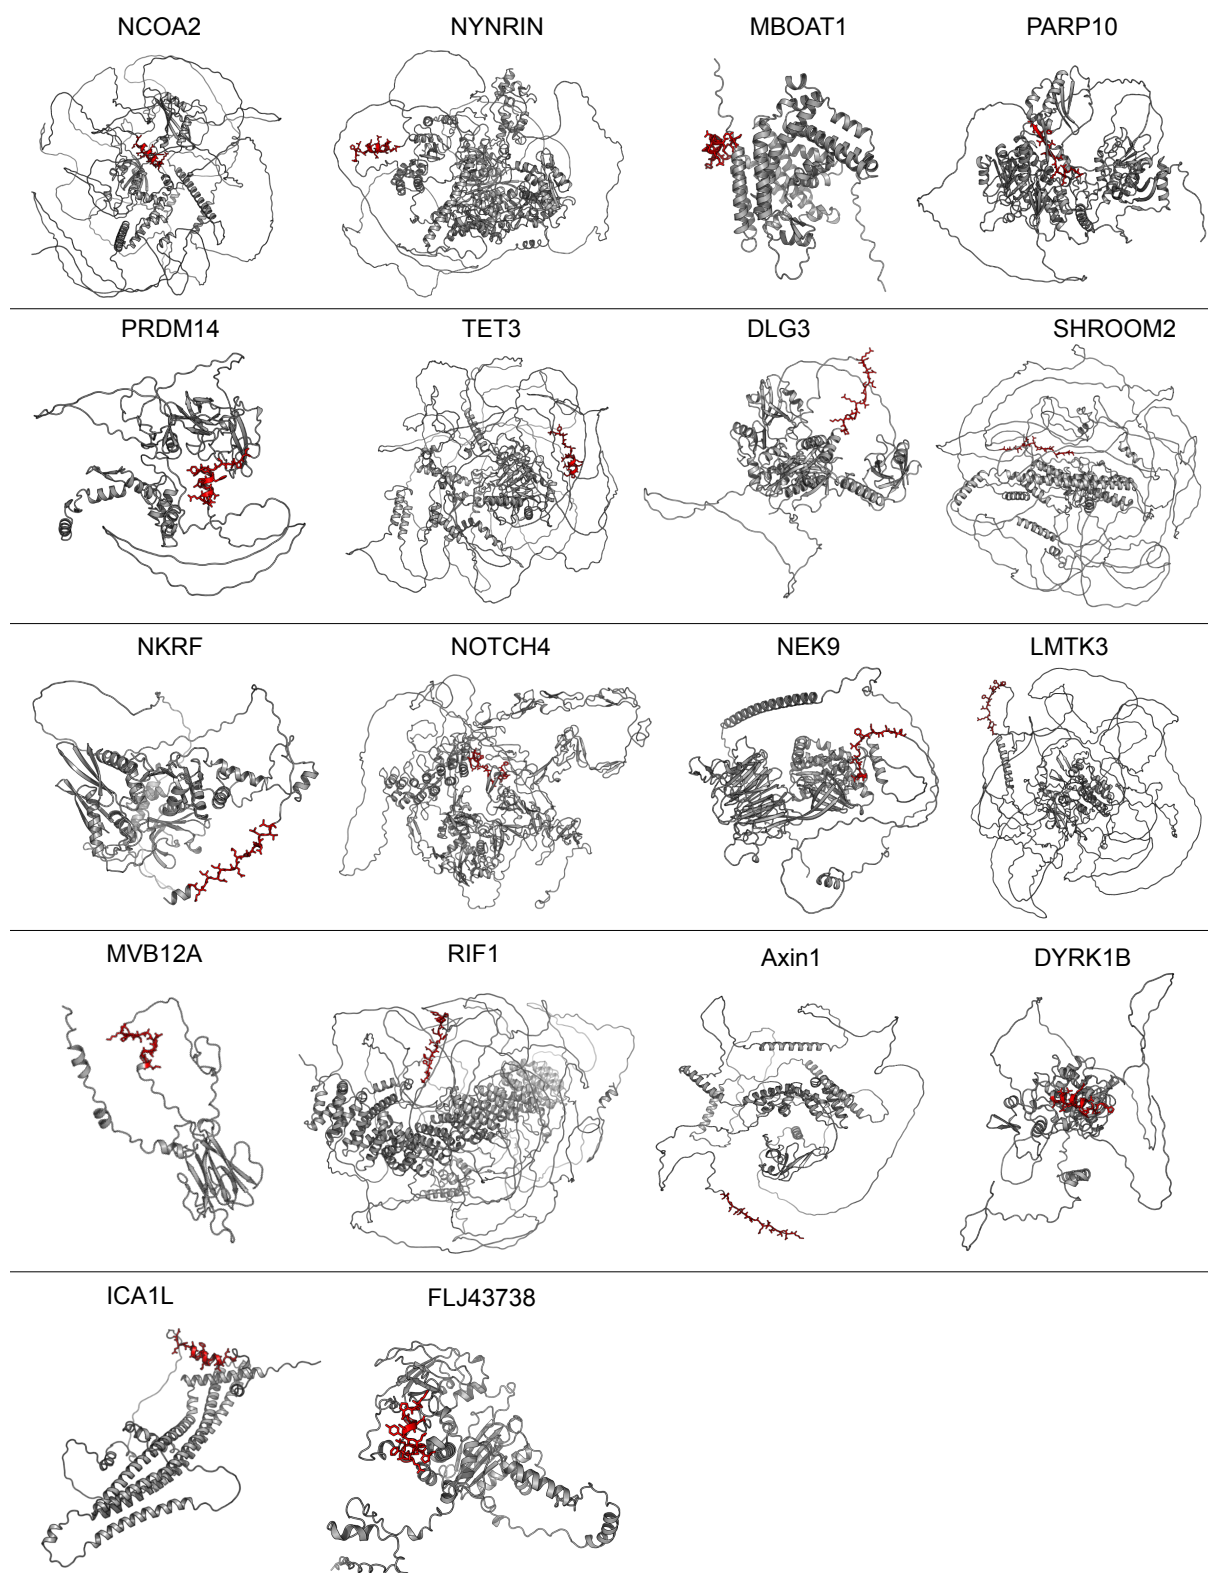

**Supplementary Figure 14. ColabFold prediction of the peptide ligands identified in this study in the context of full-length proteins.** The peptides in each case are shown as red sticks. In almost all cases the peptides are part of the predicted disordered region.

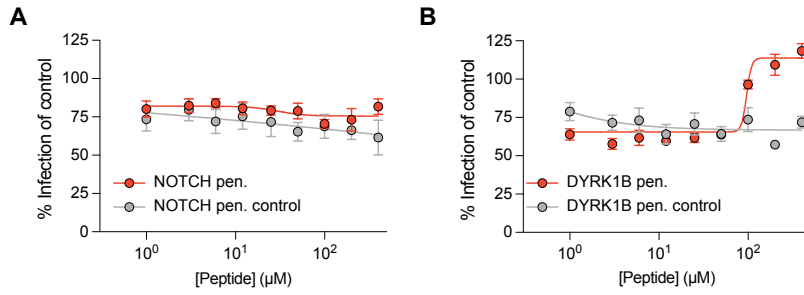

**Supplementary Figure 15. Cell penetrating peptides fail to inhibit HCoV 229E proliferation.** (A) The MRC5 cells were infected with HCoV 229E and subsequently treated with either NOTCH4 cell penetrating peptide (red dots) or the NOTCH4 control cell penetrating peptide (gray dots). (B) The same experiments were performed with the exception that the cells were treated with either DYRK1B cell penetrating peptide (red dots) or DYRK1B control cell penetrating peptide (gray dots).

## Supplementary References

- 1 Edgar, R. C. MUSCLE: multiple sequence alignment with high accuracy and high throughput. *Nucleic Acids Res* **32**, 1792-1797 (2004). <https://doi.org/10.1093/nar/gkh340>
