# Supplementary material for: Identification of motif-based interactions between SARS-CoV-2 protein domains and human peptide ligands pinpoint antiviral targets
Source: PubMed Central journal article supplement (PMC10499821; doi:10.1038/s41467-023-41312-8), 2023-09-13
Supplement: 41467_2023_41312_MOESM3_ESM.pdf [file 41467_2023_41312_MOESM3_ESM.pdf]

## **Description of Additional Supplementary Files**

**Supplementary Data 1.** Overview of all SARS-CoV-2 protein domain constructs used in this study

**Supplementary Data 2.** ProP-PD selection results

**Supplementary Data 3.** GO term analysis

**Supplementary Data 4.** Overview of the peptides and affinity measurements

**Supplementary Data 5.** NMR peak shift perturbation calculation

**Supplementary Data 6.** NMR  $T_1$ ,  $T_2$  calculation

**Supplementary Data 7.** Lentiviral constructs used in this study

**Supplementary Data 8.** Cell penetrating peptides
